# Supplementary material for: Analysis of Phospholipids, Lysophospholipids, and Their Linked Fatty Acyl Chains in Yellow Lupin Seeds (Lupinus luteus L.) by Liquid Chromatography and Tandem Mass Spectrometry
Source: MDPI journal article supplement (doi:10.3390/molecules25040805), 2020-02-13
Supplement: s1 [file s1]

**Analysis of phospholipids, lysophospholipids and their linked fatty acyl chains in yellow lupin seeds (*Lupinus luteus* L.) by liquid chromatography and tandem mass spectrometry**

C.D. Calvano<sup>\*a,c</sup>, M. Bianco<sup>b</sup>, G. Ventura<sup>b</sup>, I. Losito<sup>a,b</sup>, F. Palmisano<sup>a,b</sup>, T.R.I. Cataldi<sup>a,b</sup>

<sup>a</sup>*Centro Interdipartimentale SMART*, <sup>b</sup>*Dipartimento di Chimica*, <sup>c</sup>*Dipartimento di Farmacia-Scienze del Farmaco, Università degli Studi di Bari Aldo Moro, via Orabona 4, 70126 Bari (Italy)*

Number of Figures: 9

**Keywords:** LC-ESI-tandem MS, food, phospholipids, fatty acids, *Lupinus luteus*.

---

\*Author for correspondence, email: [cosimadamiana.calvano@uniba.it](mailto:cosimadamiana.calvano@uniba.it), [tommaso.cataldi@uniba.it](mailto:tommaso.cataldi@uniba.it)

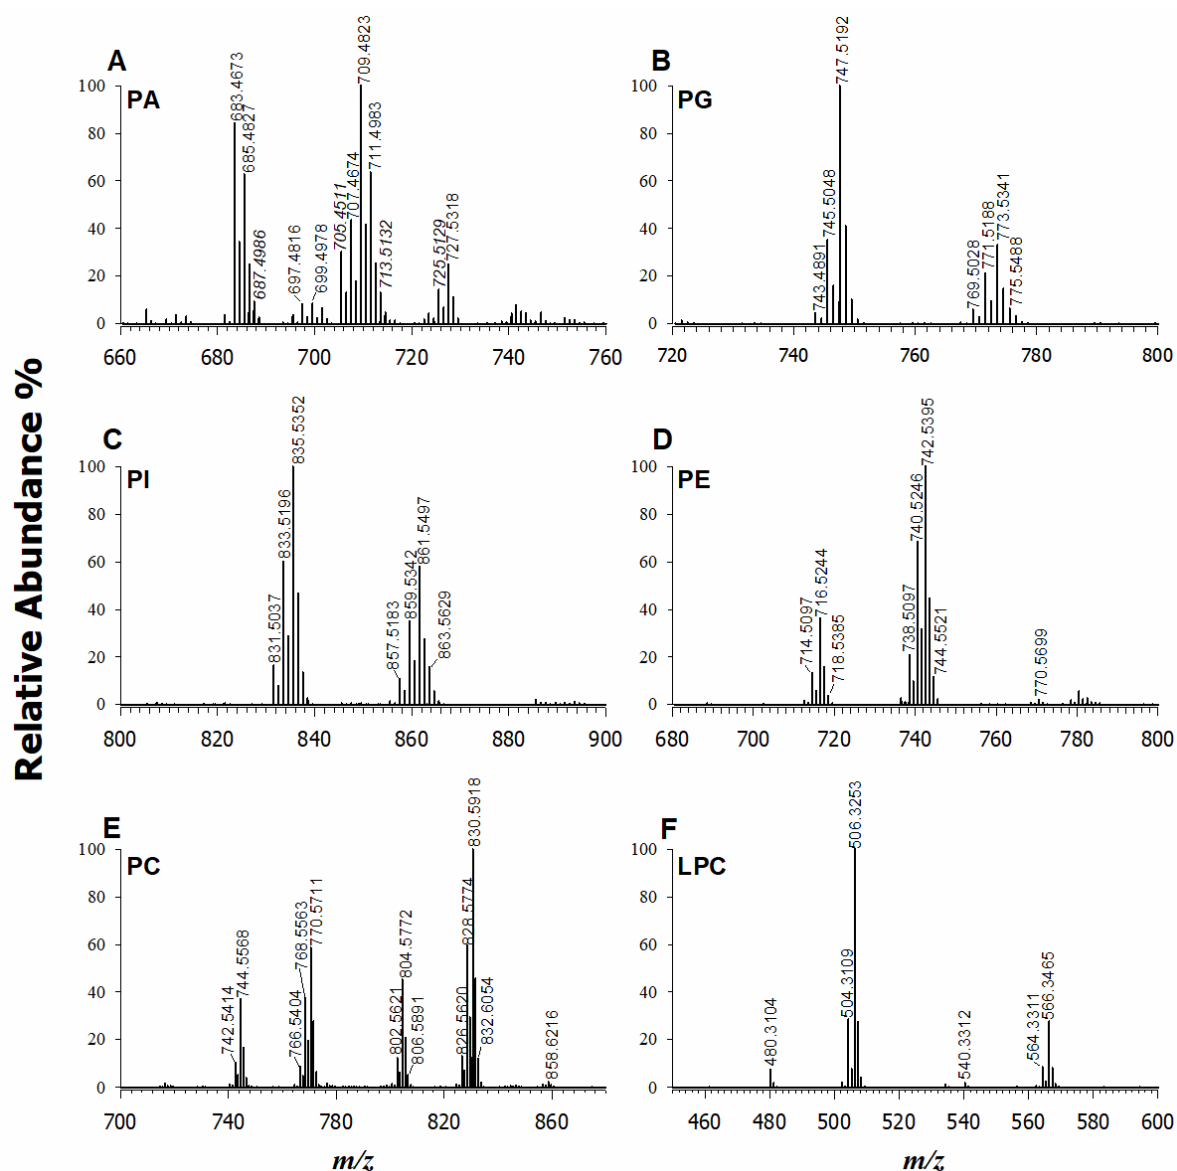

**Figure S1.**

**Figure S1.** ESI(-)-FTMS spectra of a purified lipid extract of *L. luteus* seeds relevant to PA (A), PG (B), PI (C), PE (D), PC (E) and LPC (F) in negative ion mode averaged under the corresponding chromatographic band (see Figure 1).

# Phosphatidic acids (PA)

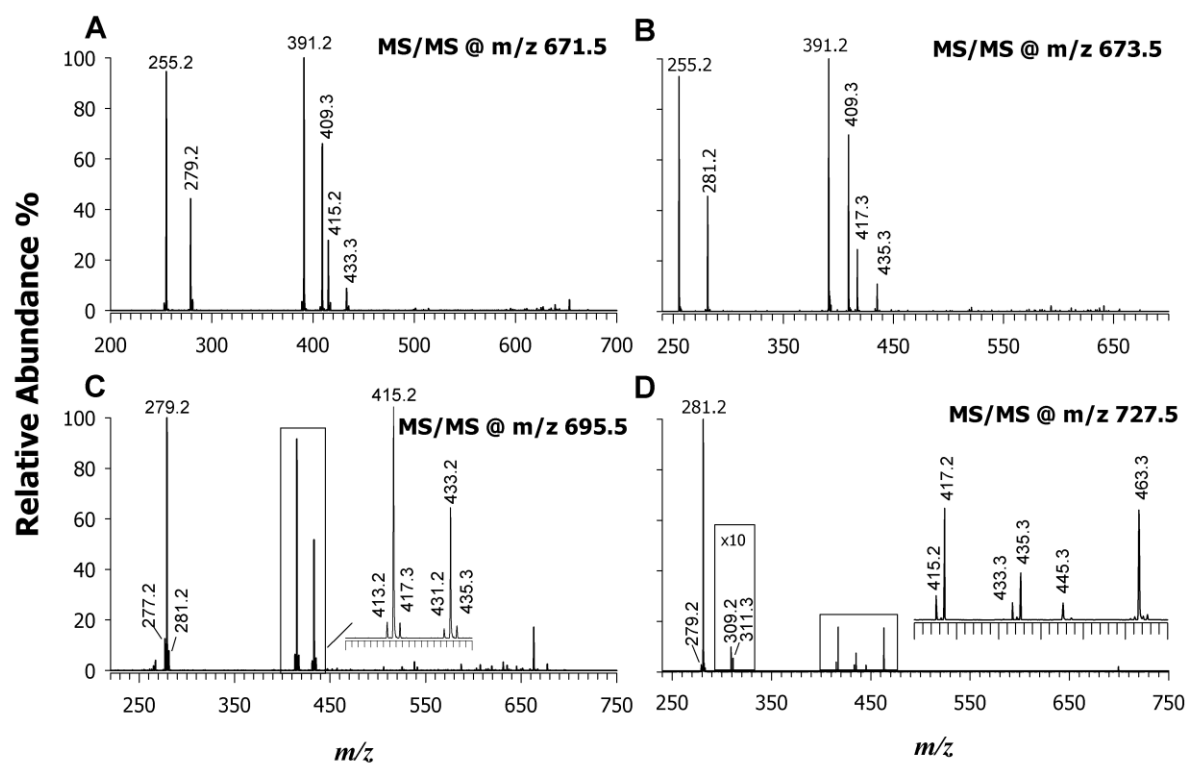

**Figure S2.** Tandem MS spectra obtained by ESI(-)-CID of representative PA identified in the lipid extract of *L. Luteus* seeds.

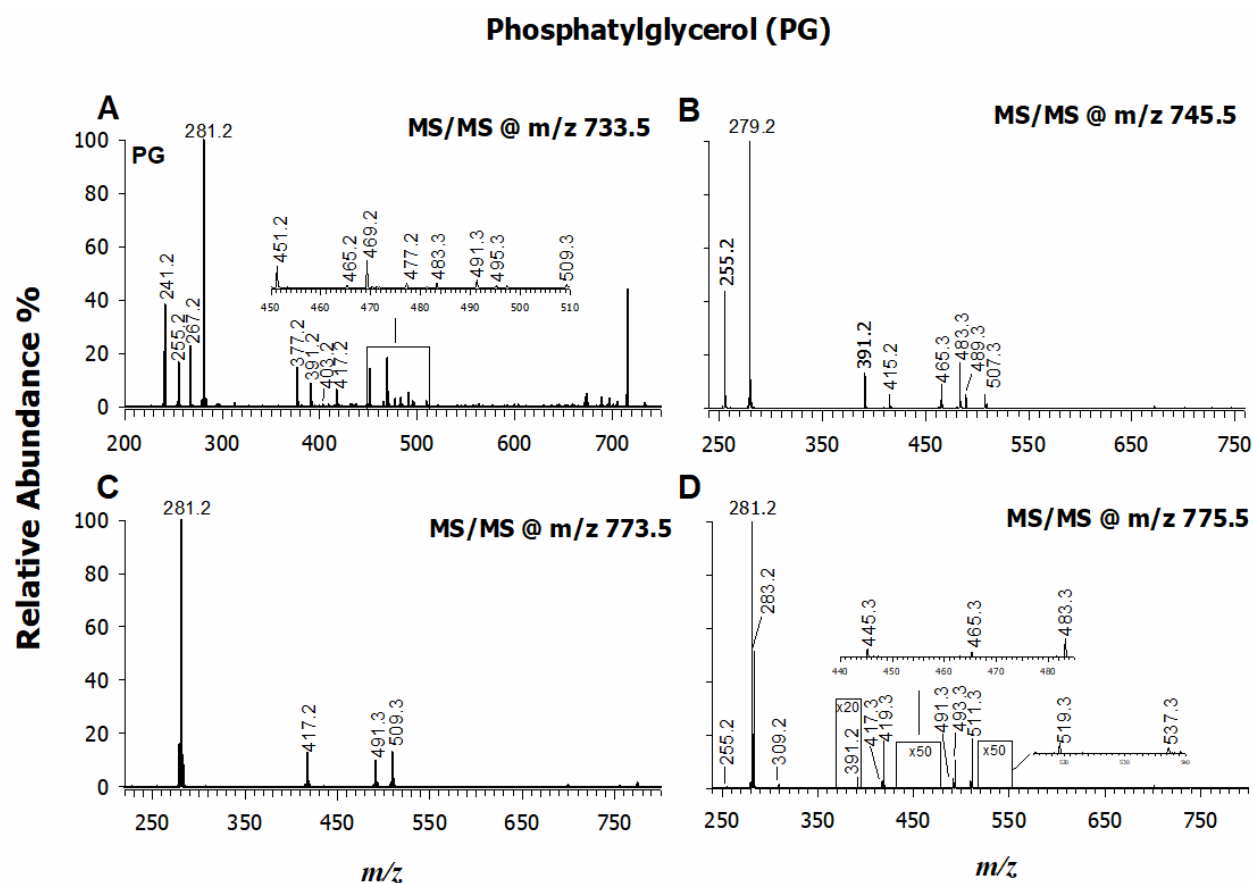

**Figure S3.** Tandem MS spectra obtained by ESI(-)-CID of representative PG identified in the lipid extract of *L. Luteus* seeds.

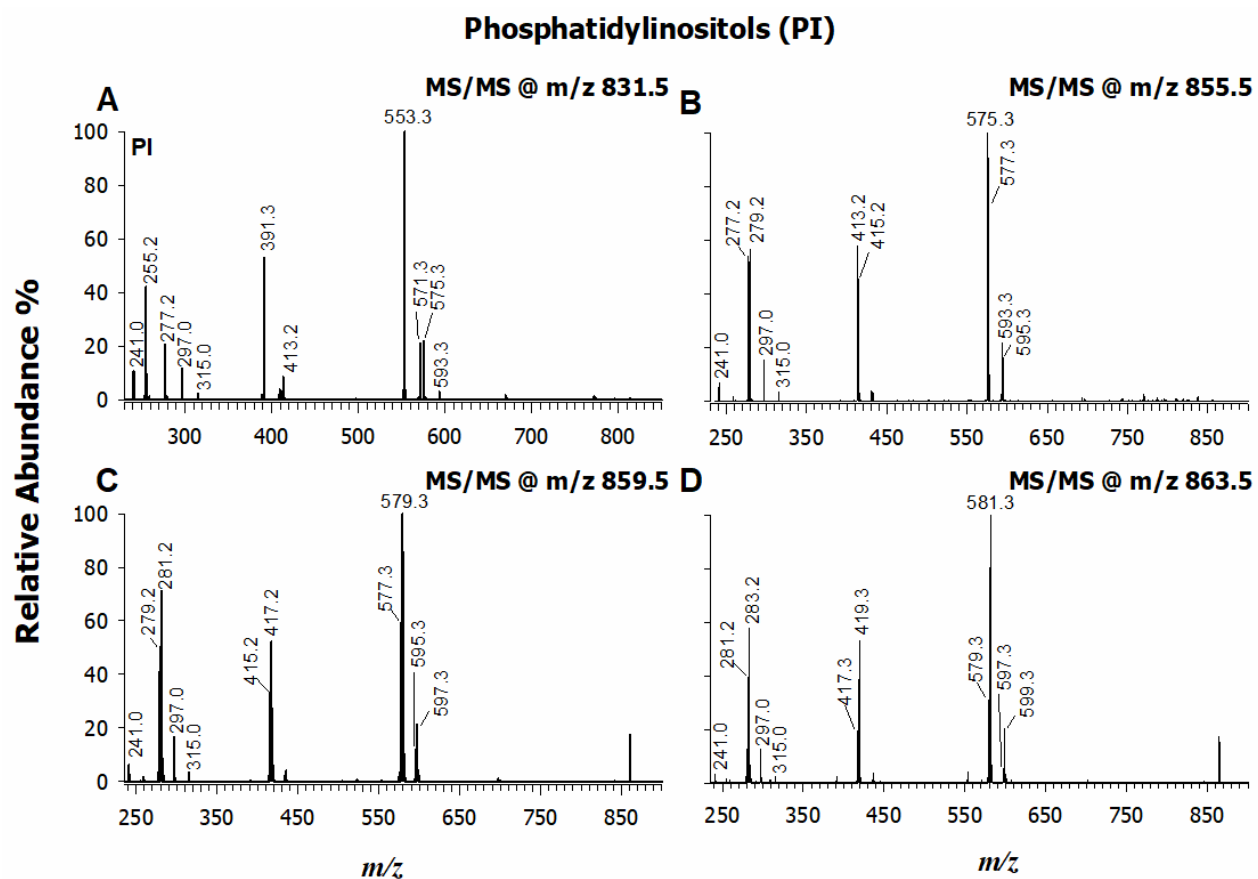

**Figure S4.** Tandem MS spectra obtained by ESI(-)-CID of representative PI identified in the lipid extract of *L. luteus* seeds.

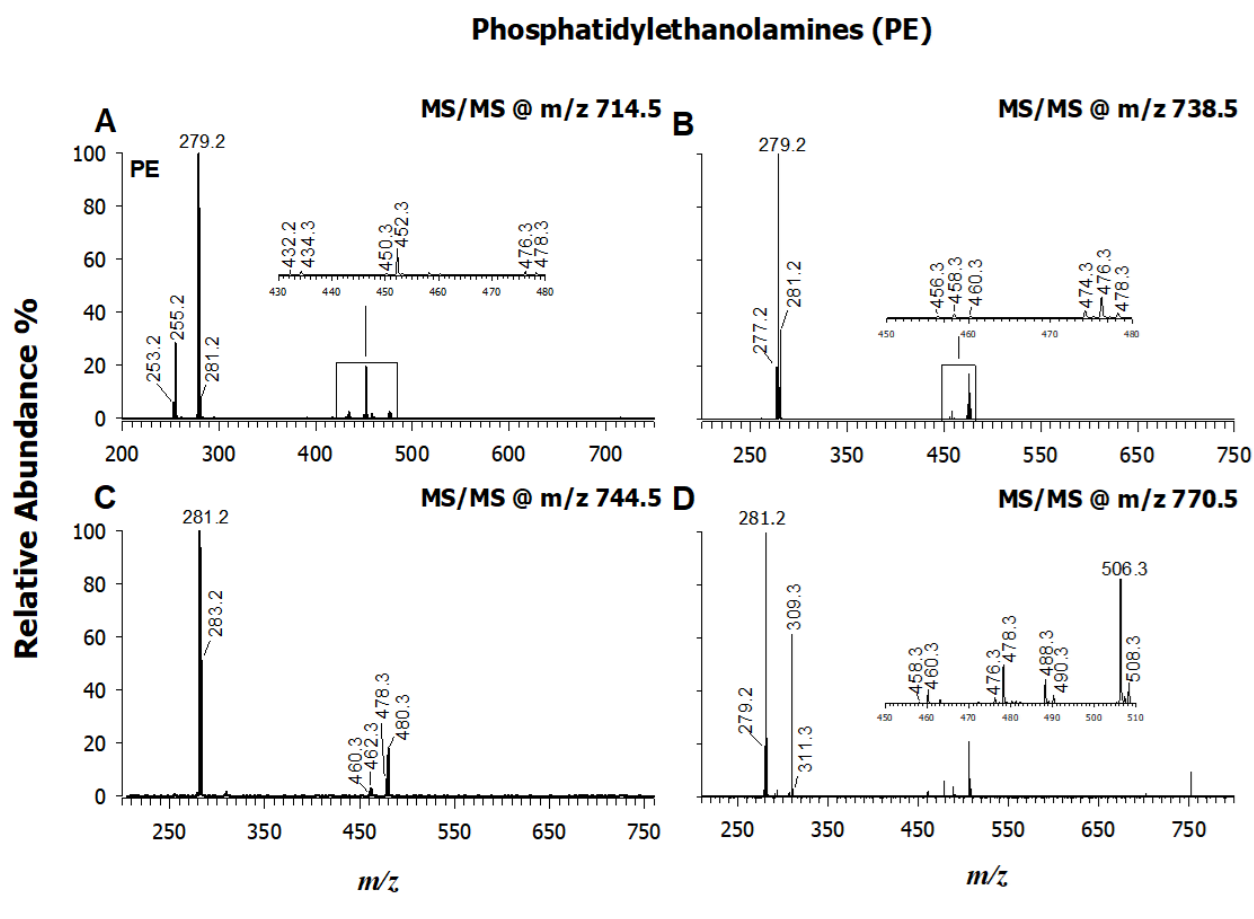

**Figure S5.** Tandem MS spectra obtained by ESI(-)-CID of representative PE identified in the lipid extract of *L. Luteus* seeds.

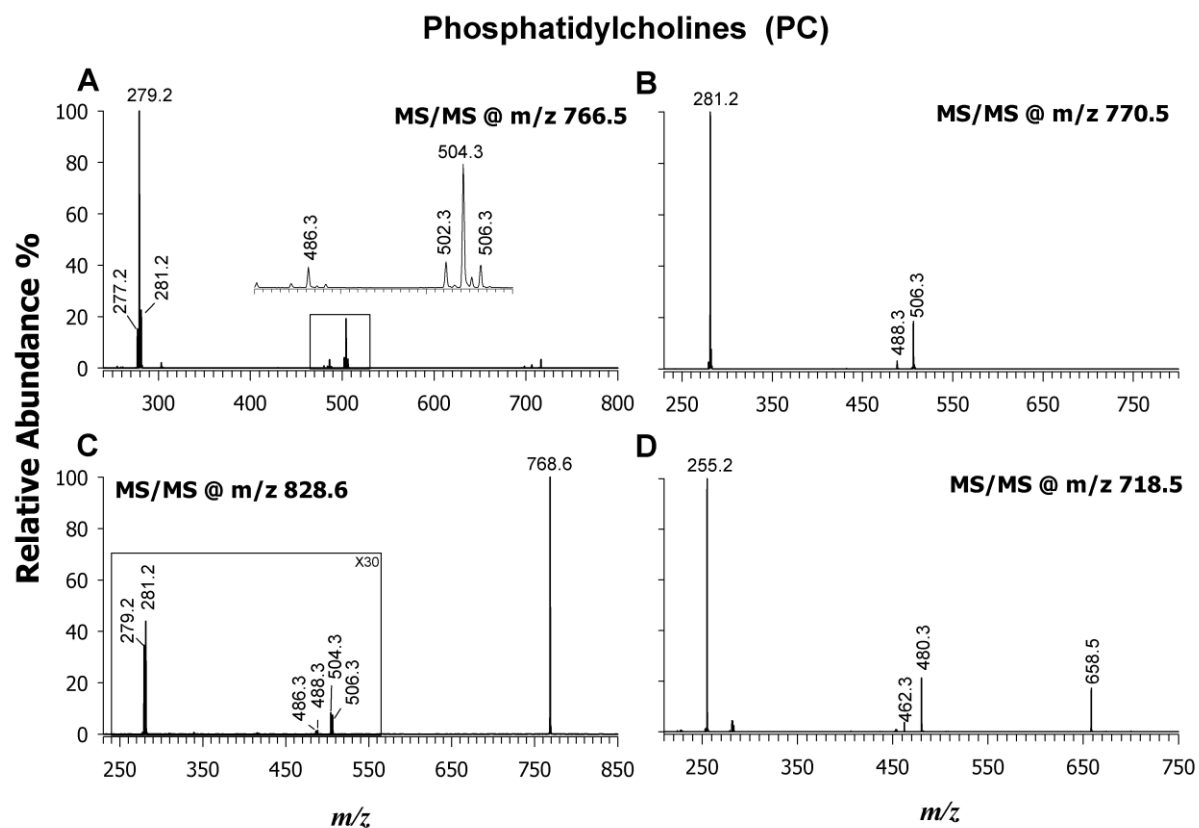

**Figure S6.** Tandem MS spectra obtained by ESI(-)-CID of representative PC identified in the lipid extract of *L. Luteus* seeds.

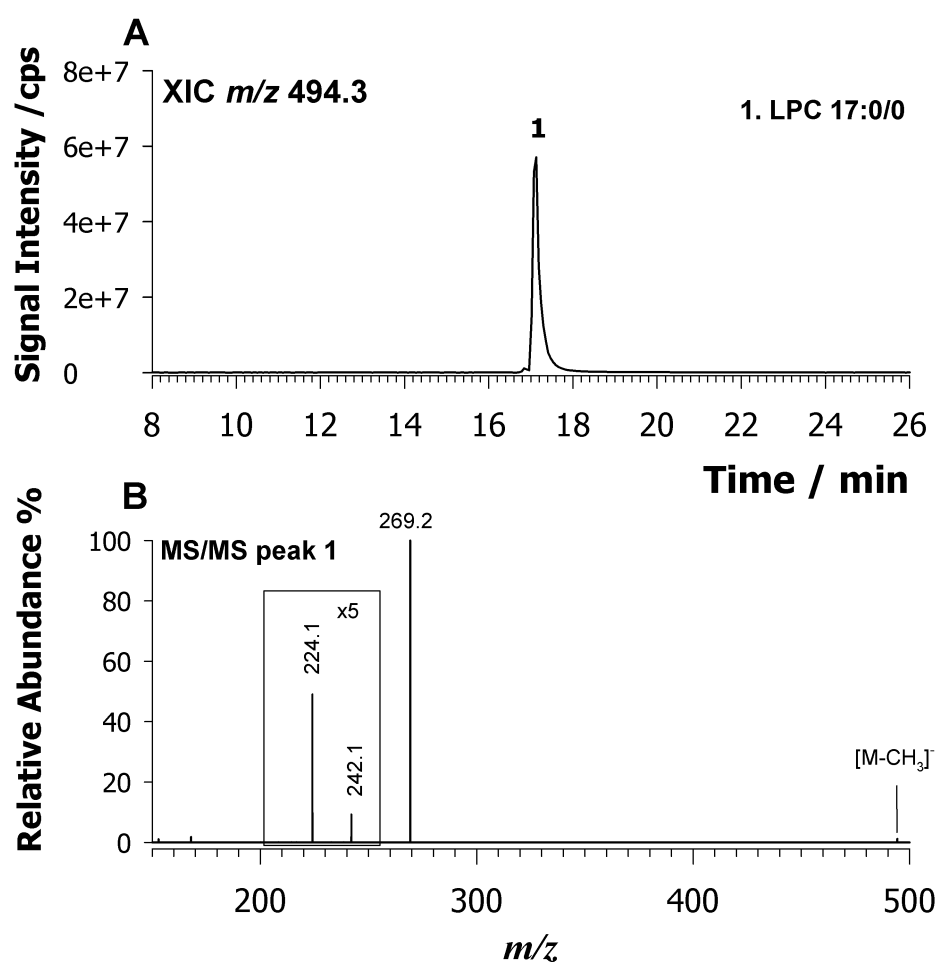

**Figure S7.**

**Figure S7.** XIC chromatogram of a standard LPC 17:0/0 observed as demethylated molecule at  $m/z$  494.3 (A) and its relevant tandem MS spectrum (B).



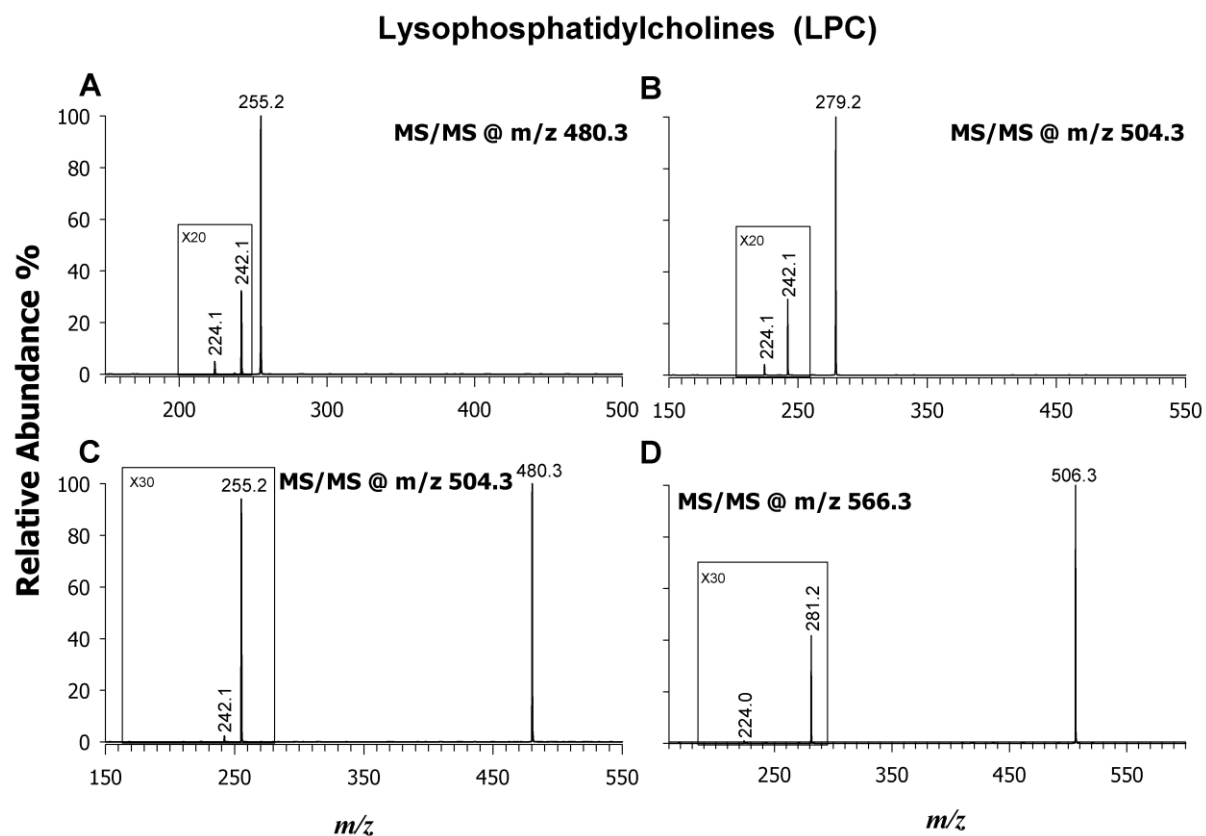

**Figure S8.** Tandem MS spectra obtained by ESI(-)-CID of representative LPC identified in the lipid extract of *L. Luteus* seeds.

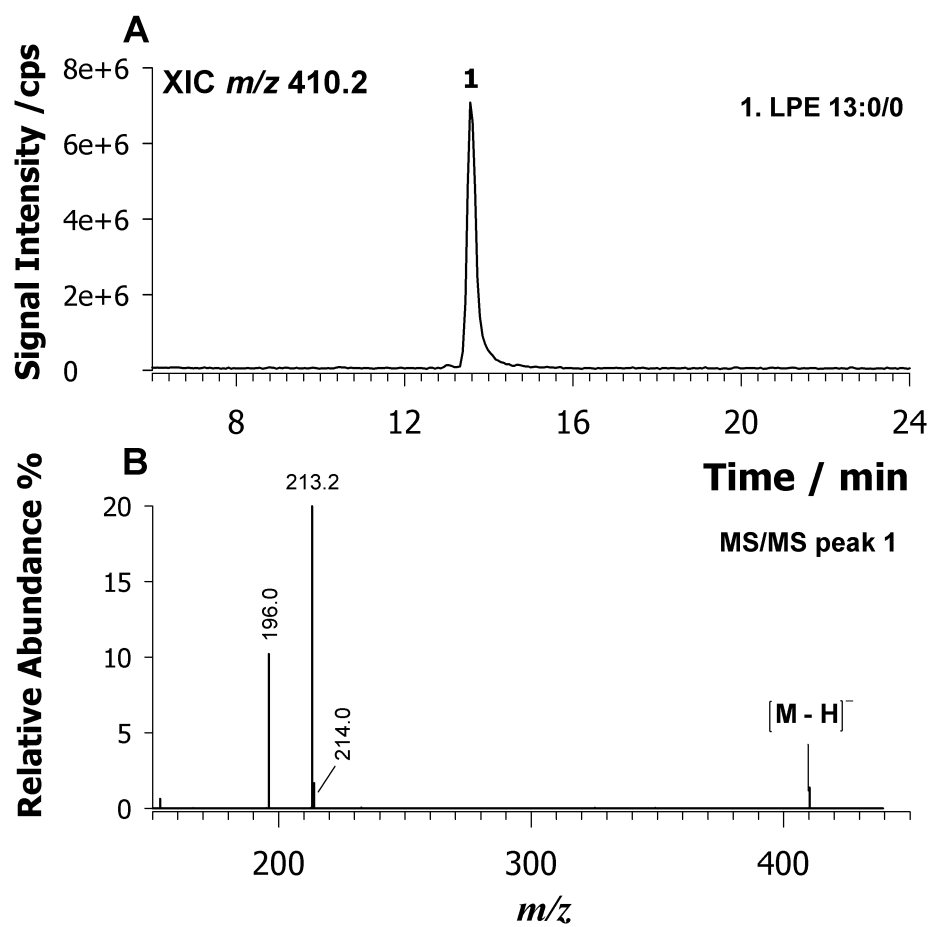

**Figure S9.** XIC chromatogram for LPE 13:0/0:0 observed as demethylated molecule at  $m/z$  410.2 (A) and its relevant tandem MS spectrum (B).
